# Supplementary material for: The role of m6A RNA methylation regulator in meningioma
Source: publisher site journal article supplement (doi:10.18632/aging.205163), 2023-10-31
Supplement: Supplementary file [file aging-v15i21-205163-supplementary-material-SD1.pdf]

## SUPPLEMENTARY TABLES

**Supplementary Table 1. Basic information of three datasets.**

| <b>Datasets</b> | <b>Samples</b>          | <b>Authors</b>     | <b>GPL platform</b> |
|-----------------|-------------------------|--------------------|---------------------|
| GSE16581        | meningioma:68           | Lee Y et al.       | GPL570              |
| GSE55609        | normal:3, meningioma:21 | Yeh TH et al.      | GPL570              |
| GSE43290        | normal:4, meningioma:47 | Taberner MD et al. | GPL96               |

**Supplementary Table 2.**  
**Genes in red module.**

---

**Red module**

---

LPHN3  
LMO4  
SLC38A4  
LRRRC17  
PLA2G4A  
HERC5  
FYN  
SH3BGR  
SULT1C4  
SLC16A1  
RARRES3  
GJA1  
TNFSF10  
BEND6  
PIR  
PPAP2C  
ACSL5  
EPB41L2  
FBXO15  
LINC00893  
CXCL11  
SNCAIP  
IMPA2  
NINJ2  
SYNC  
PC  
AMPH  
BEND5  
EFCAB7  
ADAMTSL1  
CCDC132  
CDC14A  
PRMT6  
ARNTL  
MAB21L2  
TBC1D32  
IFNGR1  
PGM3  
ZMYND12  
CNN3  
NMI  
TPR  
COX4I2  
MIER1  
PPIL4  
SBF2-AS1  
AKR7A2  
FGGY  
POLI  
CD58

ZBED5-AS1  
FAIM  
LINC00959  
SCO2  
HSF2  
CDC20  
NT5DC1  
IFI35  
PEX3  
THNSL1  
CCDC28A  
CHM  
WTAP  
EXOC4  
TAF12  
FAF1  
VAMP3  
ANKRD13C  
SNX30  
MED30  
UBE4B  
COL14A1  
C6orf57  
PROSC  
WRAP73  
DDX6  
RBM26-AS1  
DPY19L1  
CYB5D2  
NDRG3  
ZUFSP  
DENND2C  
NEU1  
ADPRHL2  
ANXA7  
MAPRE2  
CAMTA1  
OSBPL9  
HSPB11  
ZNF593  
EFHC1  
C6orf203  
LOC102606465  
ZSWIM7  
RHOC  
RP11-676J12.6  
DUSP23  
PINK1  
STX7  
FIG4

---
